# Supplementary material for: Nanopolyhedral Zn/Fe-NC derived from bimetallic zeolitic imidazole frameworks as an efficient catalyst for the oxygen reduction reaction in an air-cathode microbial fuel cell
Source: Royal Society of Chemistry journal article supplement (doi:10.1039/d3nj05279f), 2024-01-01
Supplement: d3nj05279f1.pdf [file d3nj05279f1.pdf]

*Supporting Information*

**Nanopolyhedral Zn/Fe-NC derived from bimetallic zeolitic imidazole  
frameworks as an efficient catalyst for oxygen reduction reaction in an air-  
cathode microbial fuel cell**

Qianwu Wang<sup>abc</sup>, Jingzhao Lu<sup>d</sup>, Songlin Liu<sup>c</sup>, Boqu Yu<sup>ae</sup>, Bolong Liang<sup>a\*</sup>

- a. School of Eco-Environment, Hebei Key Laboratory of Close-to-Nature Restoration Technology of Wetlands, Hebei University, Baoding 071002, China
- b. Beijing Construction Engineering Group Environmental Remediation Co., Ltd.
- c. College of Environmental Science and Engineering, Nankai University, Tianjin 300350, China
- d. College of Science and Technology, Hebei Agricultural University, Cangzhou 061100, China
- e. State Key Laboratory of Pollution Control and Resource Reuse, Nanjing University, Nanjing 210093, China

---

\* Corresponding author. E-mail: liangbolong@hbu.edu.cn

**Text S1**

The components of PBS solution

The PBS consists of  $\text{NH}_4\text{Cl}$  ( $0.31 \text{ g L}^{-1}$ ),  $\text{KCl}$  ( $0.13 \text{ g L}^{-1}$ ),  $\text{NaH}_2\text{PO}_4 \cdot 2\text{H}_2\text{O}$  ( $3.321 \text{ g L}^{-1}$ ),  $\text{Na}_2\text{HPO}_4$  ( $4.090 \text{ g L}^{-1}$ ), trace mineral ( $12.5 \text{ mL L}^{-1}$ ), and vitamin ( $5 \text{ mL L}^{-1}$ ) solution.

**Table S1**

Porous structure parameters of different cathodes.

| Samples                                | NC      | Zn/Fe-NC-0.1 | Zn/Fe-NC-0.3 | Zn/Fe-NC-0.5 | Zn/Fe-NC-0.7 | Zn/Fe-NC-0.9 |
|----------------------------------------|---------|--------------|--------------|--------------|--------------|--------------|
| BET Surface Area (m <sup>2</sup> /g)   | 1371.59 | 1049.70      | 982.60       | 1023.01      | 1120.62      | 805.17       |
| Micropore Area (m <sup>2</sup> /g)     | 1160.11 | 938.6        | 874.16       | 941.83       | 988.35       | 727.41       |
| Mesopore Area (m <sup>2</sup> /g)      | 211.48  | 111.10       | 108.44       | 81.18        | 132.27       | 77.76        |
| Total pore volume (cm <sup>3</sup> /g) | 0.674   | 0.483        | 0.467        | 0.454        | 0.526        | 0.360        |
| Micropore volume (cm <sup>3</sup> /g)  | 0.583   | 0.427        | 0.407        | 0.412        | 0.461        | 0.317        |
| Average Pore Size (nm)                 | 1.96    | 1.84         | 1.90         | 1.78         | 1.88         | 1.78         |

**Table S2**

Element contents of all samples measured from XPS analysis (at. %).

| Samples      | Total N | N type      |                       |             |               |
|--------------|---------|-------------|-----------------------|-------------|---------------|
|              |         | Pyridinic N | Pyrrolic N<br>or Fe-N | Graphitic N | Oxidized<br>N |
| NC           | 7.31    | 47          | 15                    | 26          | 12            |
| Zn/Fe-NC-0.1 | 6.81    | 43          | 20                    | 22          | 15            |
| Zn/Fe-NC-0.3 | 7.12    | 44          | 19                    | 23          | 14            |
| Zn/Fe-NC-0.5 | 7.46    | 45          | 20                    | 25          | 10            |
| Zn/Fe-NC-0.7 | 7.43    | 44          | 20                    | 24          | 12            |
| Zn/Fe-NC-0.9 | 7.20    | 43          | 24                    | 22          | 11            |

**Table S3**

Fe 2p of all samples measured from XPS analysis (at. %).

| Samples      | Fe 2p                  |                        |                        |           |
|--------------|------------------------|------------------------|------------------------|-----------|
|              | 2p3/2 Fe <sup>3+</sup> | 2p3/2 Fe <sup>2+</sup> | 2p1/2 Fe <sup>2+</sup> | Fe-C bond |
| Zn/Fe-NC-0.1 | 30.89                  | 26.68                  | 33.45                  | 8.98      |
| Zn/Fe-NC-0.3 | 25.49                  | 37.89                  | 26.69                  | 9.93      |
| Zn/Fe-NC-0.5 | 29.90                  | 32.27                  | 26.21                  | 11.62     |
| Zn/Fe-NC-0.7 | 26.78                  | 35.51                  | 32.74                  | 4.97      |
| Zn/Fe-NC-0.9 | 19.88                  | 43.17                  | 32.75                  | 4.20      |

**Table S4**

The onset potential and half-wave potential for ORR for the catalysts

| Samples      | Onset potential<br>(vs. Ag/AgCl) | Onset potential<br>(vs. SHE) | Half-wave potential<br>(vs. Ag/AgCl) | Half-wave potential<br>(vs. SHE) |
|--------------|----------------------------------|------------------------------|--------------------------------------|----------------------------------|
| Zn/Fe-NC-0.1 | 0.158 V                          | 0.353 V                      | -0.017 V                             | 0.178 V                          |
| Zn/Fe-NC-0.3 | 0.169 V                          | 0.364 V                      | -0.002 V                             | 0.193 V                          |
| Zn/Fe-NC-0.5 | 0.236 V                          | 0.431 V                      | 0.053 V                              | 0.248 V                          |
| Zn/Fe-NC-0.7 | 0.205 V                          | 0.400 V                      | 0.051 V                              | 0.246 V                          |
| Zn/Fe-NC-0.9 | 0.162 V                          | 0.357 V                      | -0.008 V                             | 0.187 V                          |
| 10% Pt/C     | 0.195 V                          | 0.390 V                      | 0.005 V                              | 0.200 V                          |

**Table S5**

Compare the performance of MFCs with different cathode catalysts.

| Catalyst             | Anode                | Cathode              | Device type    | Max. p (mW m <sup>-2</sup> ) | Ref.      |
|----------------------|----------------------|----------------------|----------------|------------------------------|-----------|
| Fe-N-C               | Carbon fiber brush   | Carbon cloth         | Single chamber | 1308                         | [1]       |
| Fe-N/C               | Carbon fiber brush   | Carbon paper         | Single chamber | 1232.9                       | [2]       |
| Fe-N <sub>x</sub> /C | Carbon fiber brush   | Carbon cloth         | Single chamber | 1227                         | [3]       |
| Fe/N-HCN             | Graphite fiber brush | Carbon cloth         | Single chamber | 1300                         | [4]       |
| Fe-N-C/G             | Graphite felt        | Carbon fiber cloth   | Single chamber | 1601                         | [5]       |
| Cu@N-C               | Carbon felt          | Stainless-steel mesh | Single chamber | 1760                         | [6]       |
| Zn/Fe-NC-0.5         | Carbon felt          | Stainless-steel mesh | Single chamber | 1954                         | This work |

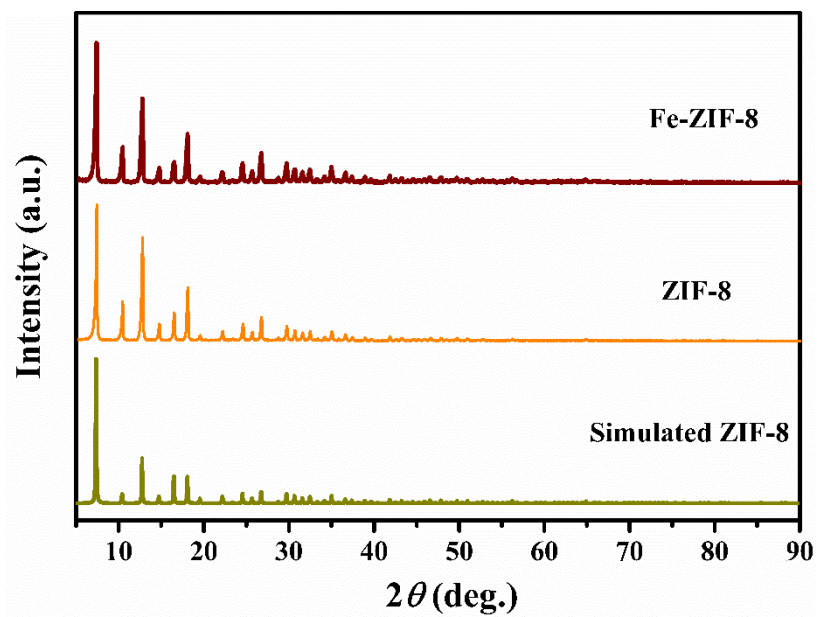

**Fig. S1.** XRD patterns of ZIF-8 and Fe-ZIF-8. (Note that Fe-ZIF-8 is the sample, which is the 0.5g of Fe(acac)<sub>3</sub> added)



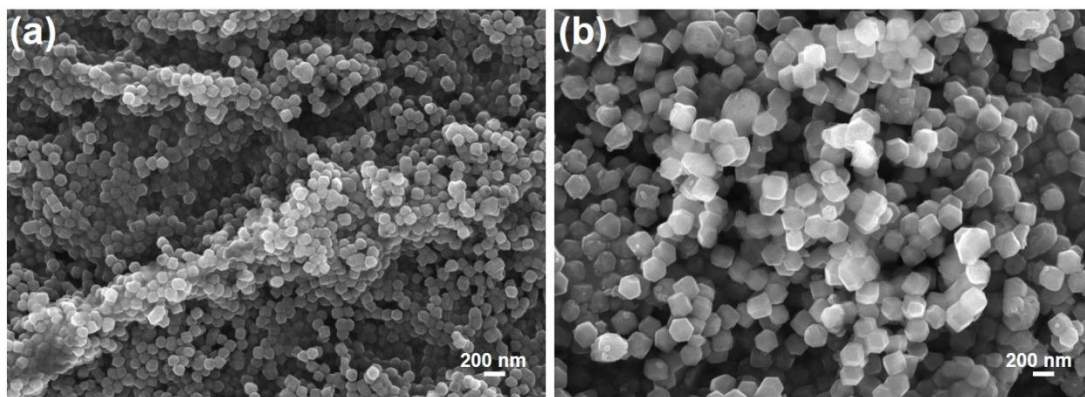

**Fig. S2.** SEM images of (a) ZIF-8 and (b) Fe-ZIF-8. (Note that Fe-ZIF-8 material is the sample, which is the 0.5g of  $\text{Fe}(\text{acac})_3$  added)

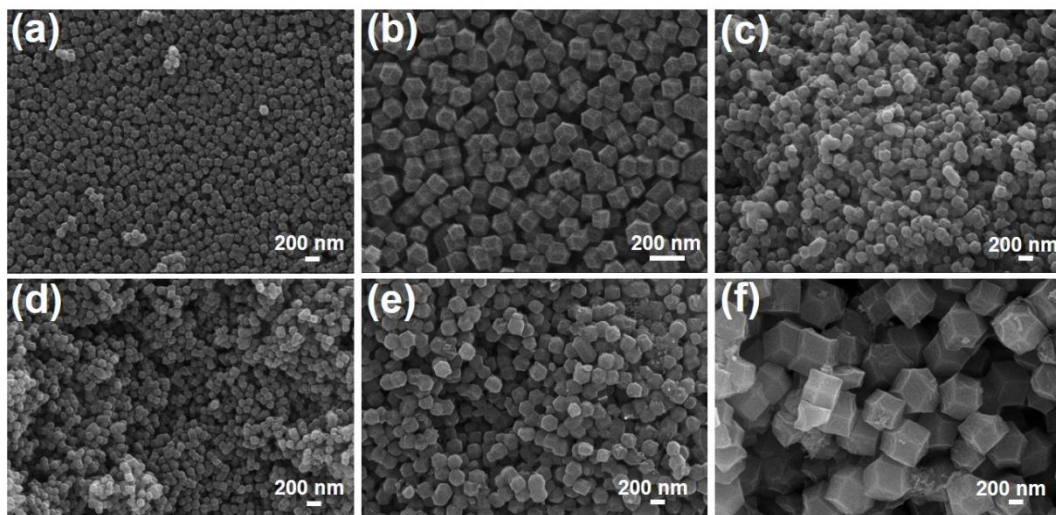

**Fig. S3.** SEM images of (a-b) NC, (c) Zn/Fe-NC-0.1, (d) Zn/Fe-NC-0.3, (e) Zn/Fe-NC-0.7 and (f) Zn/Fe-NC-0.9.

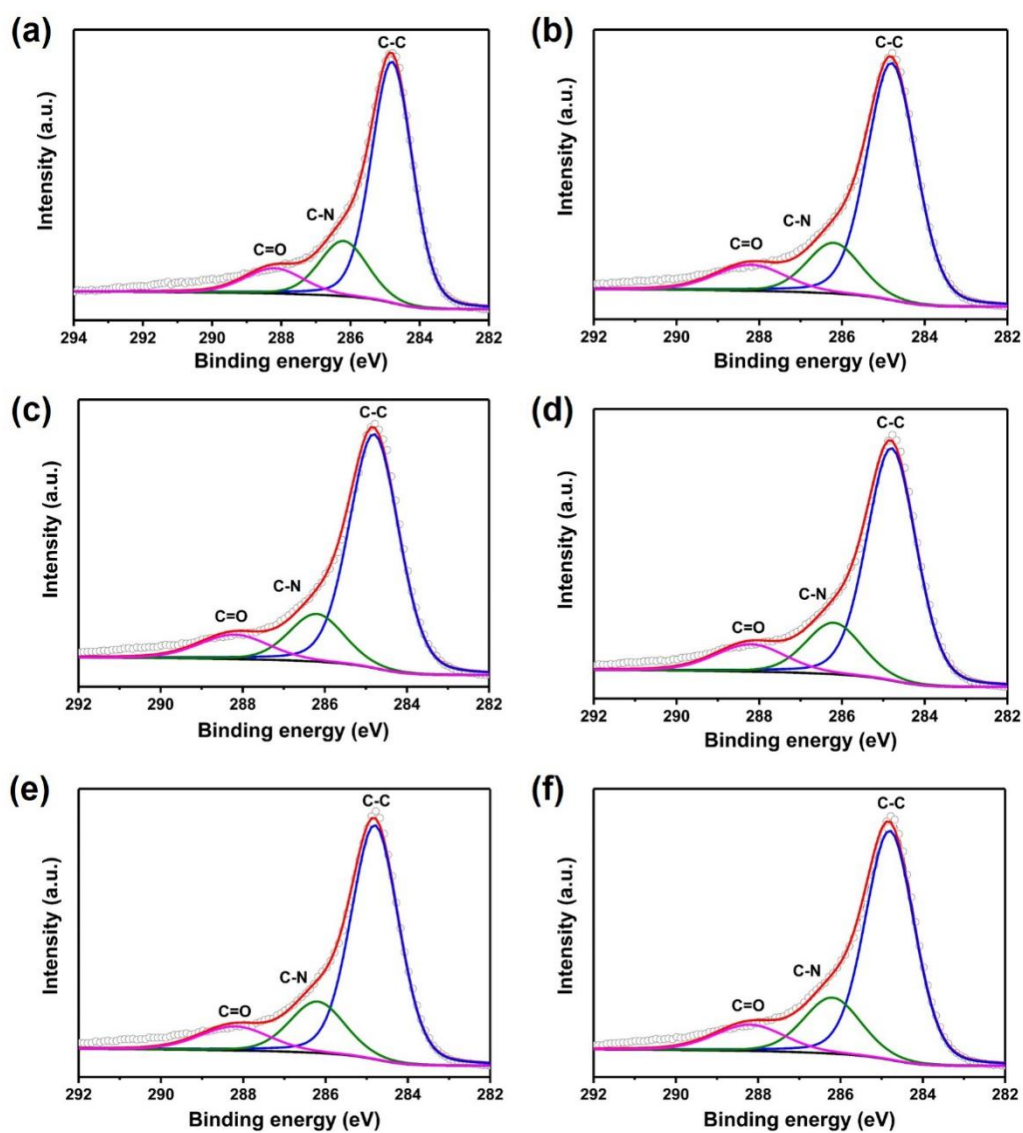

**Fig. S4.** C 1s XPS spectra of (a) NC, (b) Zn/Fe-NC-0.1, (c) Zn/Fe-NC-0.3, (d) Zn/Fe-NC-0.5, (e) Zn/Fe-NC-0.7 and (f) Zn/Fe-NC-0.9.

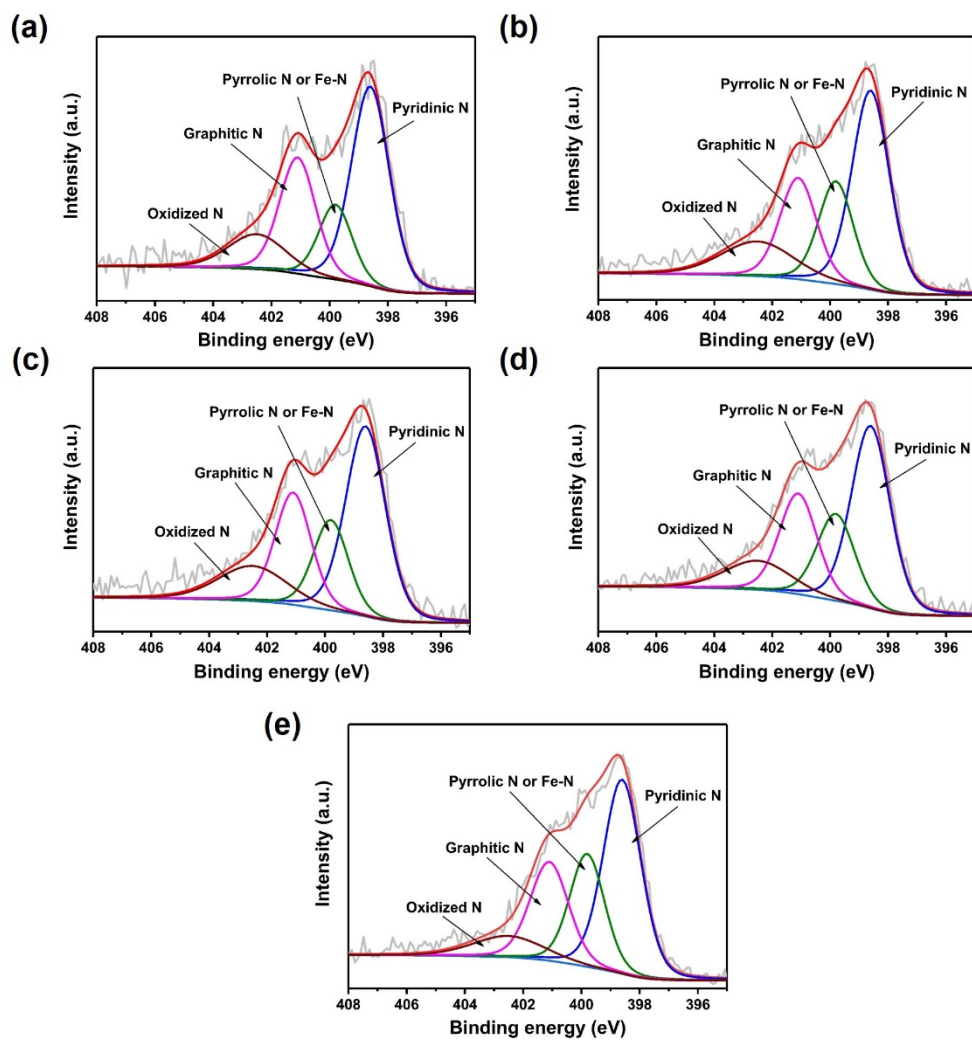

**Fig. S5.** N 1s XPS spectra of (a) NC, (b) Zn/Fe-NC-0.1, (c) Zn/Fe-NC-0.3, (d) Zn/Fe-NC-0.7, (e) Zn/Fe-NC-0.9

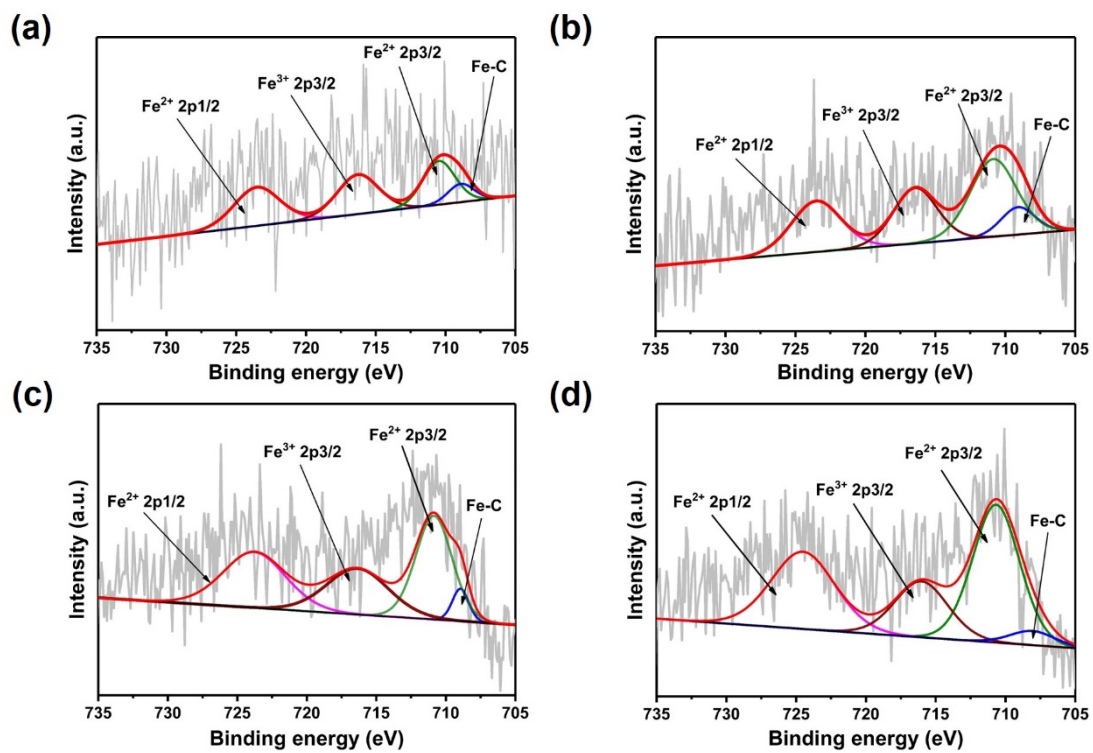

**Fig. S6.** Fe 2p XPS spectra of (a) Zn/Fe-NC-0.1, (b) Zn/Fe-NC-0.3, (c) Zn/Fe-NC-0.7 and (d) Zn/Fe-NC-0.9.

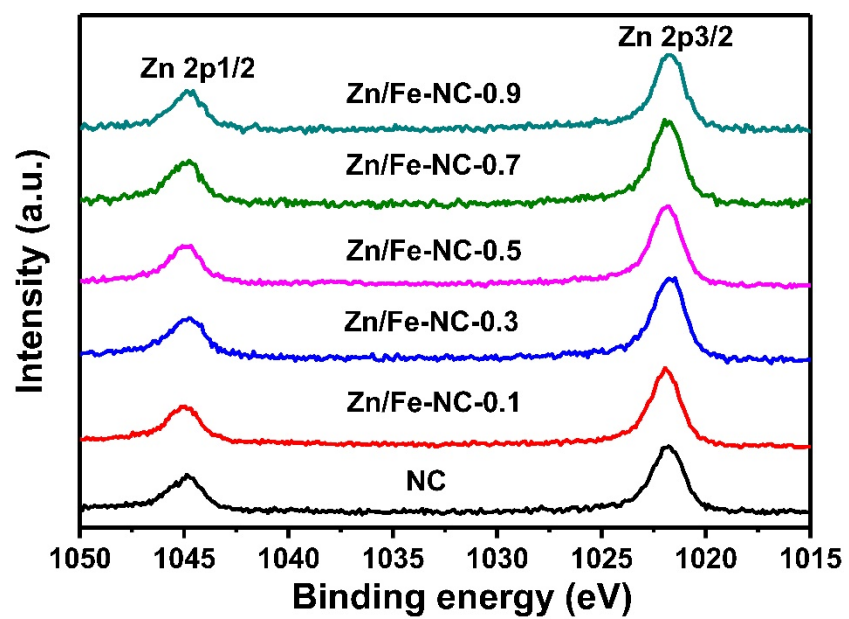

Fig. S7. Zn 2p XPS spectra of NC and Zn/Fe-NC-x.

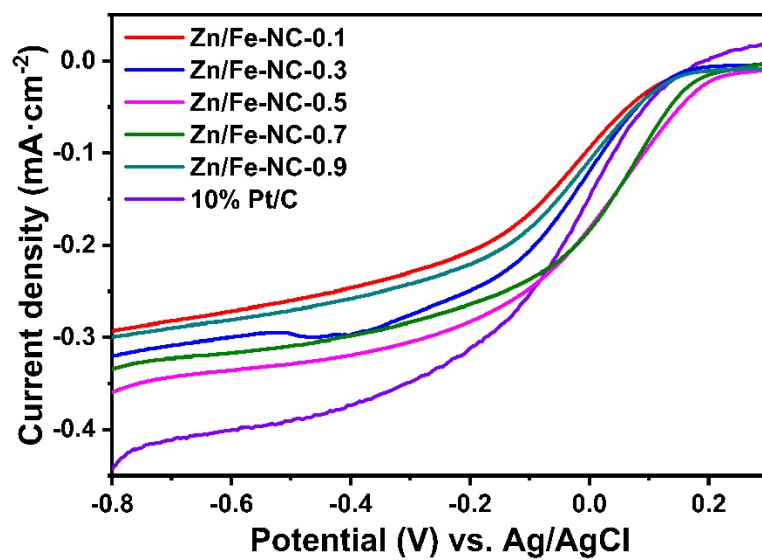

**Fig. S8.** LSV curves of different catalysts at a rotation rate of 1600 rpm.

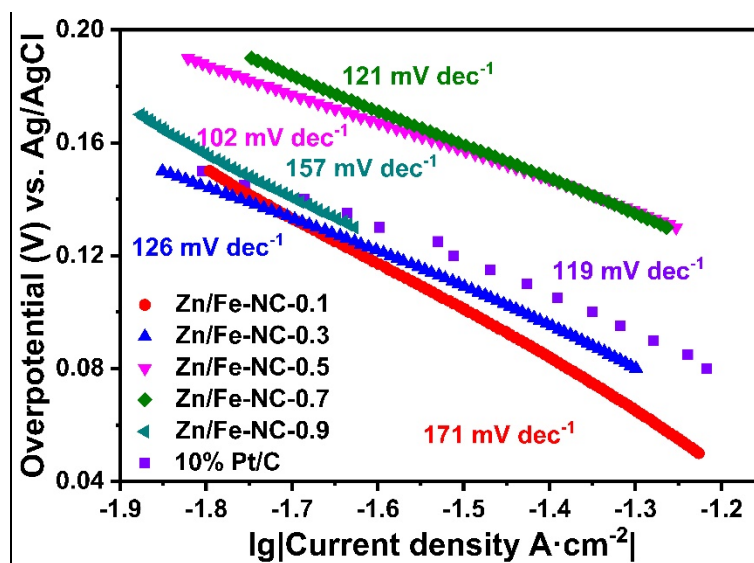

Fig. S9. Tafel curves of different catalysts at a rotation rate of 1600 rpm.



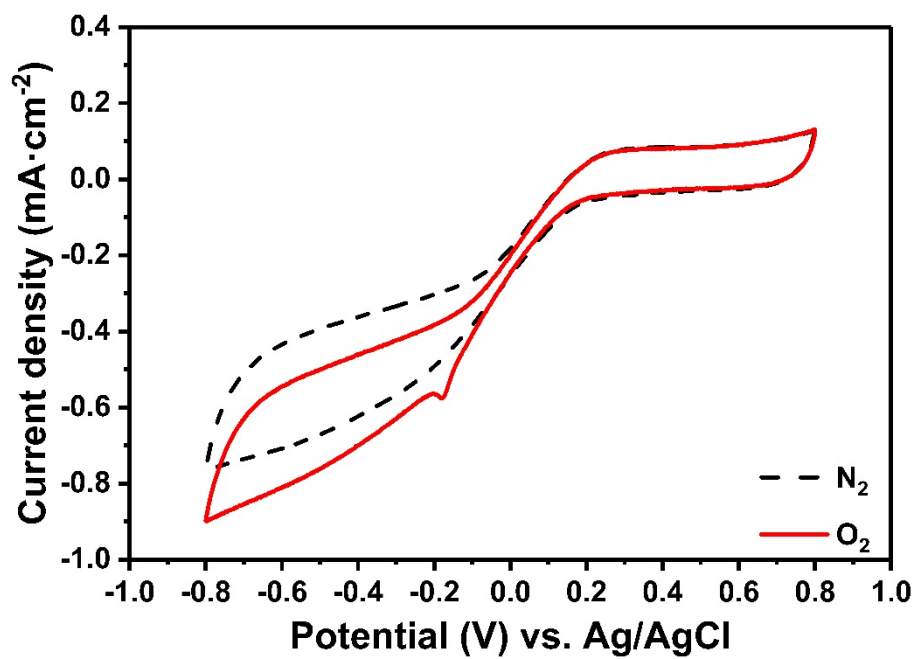

**Fig. S10.** CV curves of Zn/Fe-NC-0.5 at a rotation rate of 1600 rpm in O<sub>2</sub>-saturated and N<sub>2</sub>-saturated PBS solution.

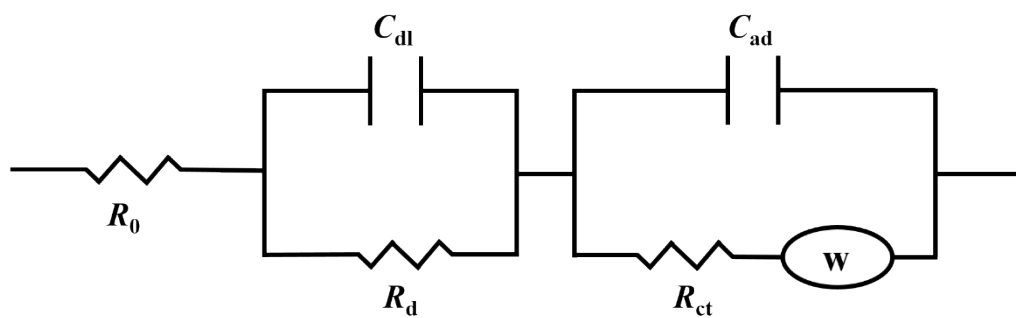

**Fig. S11.** Equivalent circuit of EIS modeling.

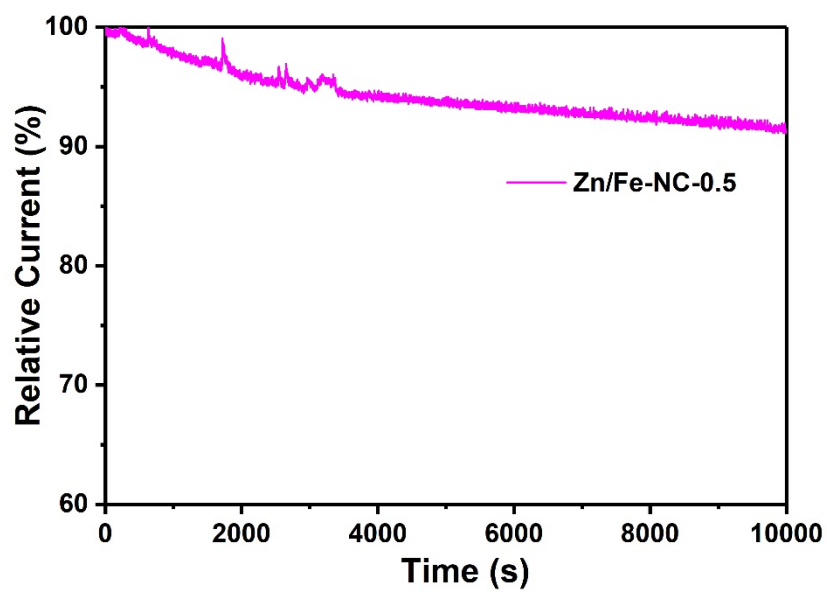

**Fig. S12.** I-t curve of Zn/Fe-NC-0.5 with the rotation speed of 1600 rpm.

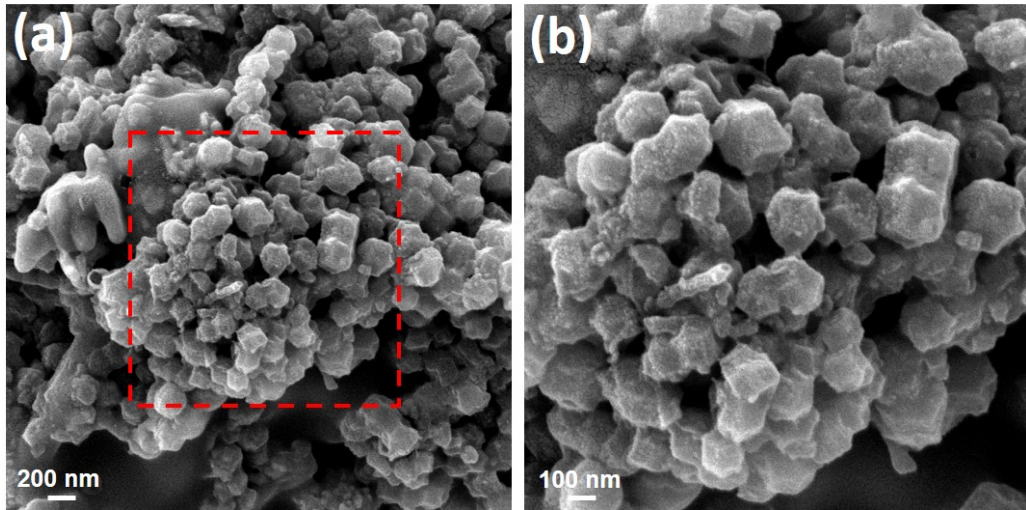

**Fig. S13.** SEM images after i-t test for 10000 s.

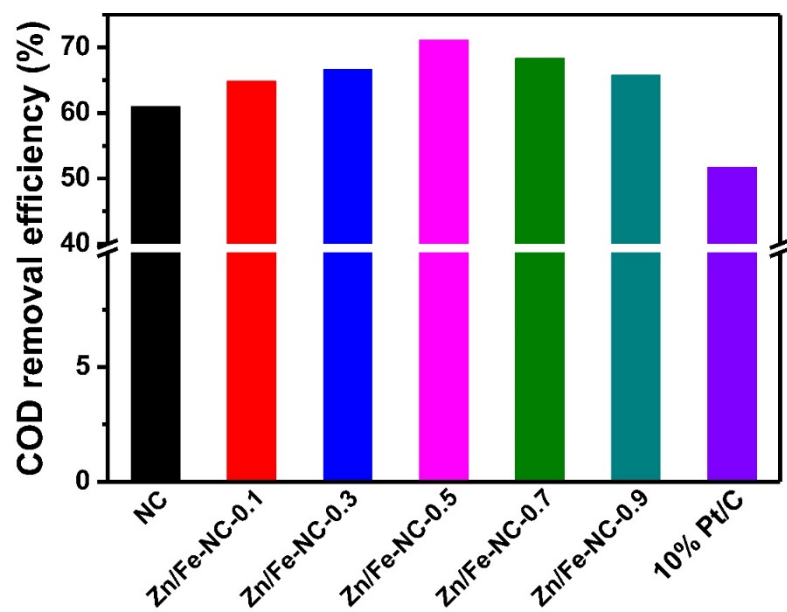

Fig. S14. COD removal efficiency of MFCs.

## References

1. G. X. Yang, Z. Z. Zhang, X. H. Kang, L. H. Li, Y. Li and Y. M. Sun, *ACS Appl. Energy Mater.*, 2020, **3**, 11929-11938.
2. X. Luo, W. L. Han, W. C. Du, Z. M. Huang, Y. Jiang and Y. Zhang, *J. Power Sources*, 2020, **469**.
3. G. Lu, Y. Zhu, L. Lu, K. Xu, H. Wang, Y. Jin, Z. J. Ren, Z. Liu and W. Zhang, *J. Power Sources*, 2016, **315**, 302-307.
4. L. Zhou, C. Yang, J. Wen, P. Fu, Y. Zhang, J. Sun, H. Wang and Y. Yuan, *J. Mater. Chem. A*, 2017, **5**, 19343-19350.
5. C. Cao, L. L. Wei, G. Wang, J. T. Liu, Q. R. Zhai and J. Q. Shen, *Inorg. Chem. Front.*, 2017, **4**, 1930-1938.
6. M. Zhong, C. Ren, D. Z. Fang, C. C. Lv and K. X. Li, *J. Electroanal. Chem.*, 2020, **878**.
